# Supplementary material for: Development of an Immune-Related Prognostic Signature in Breast Cancer
Source: Front Genet. 2020 Jan 28;10:1390. doi: 10.3389/fgene.2019.01390 (PMC6997532; doi:10.3389/fgene.2019.01390)
Supplement: Supplementary file 1 [file Table_1.xlsx]

## Sheet: Sheet1
Table S1. 991 immune-related genes between high and low immune score groups
up-regulated IRGs
	logFC	AveExpr	t	P.Value	adj.P.Val	B
PLA2G2D	3.07176	4.64037	16.7847	1.93468e-50	1.19276e-48	103.908
CXCL9	3.03064	9.60693	18.0822	1.46942e-56	1.12986e-54	117.93
IDO1	2.94089	6.48845	17.399	2.52687e-53	1.7121e-51	110.516
MS4A1	2.92885	4.84949	14.2339	8.05681e-39	3.30152e-37	77.2998
CD38	2.87707	4.50339	18.6687	2.34175e-59	2.07225e-57	124.341
GZMB	2.86931	4.76462	18.8466	3.29226e-60	3.01742e-58	126.294
GBP5	2.84435	7.87879	21.4188	1.24841e-72	2.44094e-70	154.764
CXCL13	2.78959	6.92407	12.252	2.37891e-30	7.08838e-29	57.9265
TIGIT	2.75084	5.56302	21.4322	1.07474e-72	2.16318e-70	154.913
GZMK	2.74733	6.03526	19.4684	3.39501e-63	3.63019e-61	133.139
CCL19	2.72262	6.59243	12.3094	1.3795e-30	4.17101e-29	58.4674
SH2D1A	2.69035	4.99377	21.2081	1.31358e-71	2.34502e-69	152.421
SIRPG	2.6883	4.4737	21.7277	3.94995e-74	9.32097e-72	158.202
TRAT1	2.64747	3.75806	21.2458	8.61956e-72	1.56601e-69	152.841
CD3G	2.64113	4.37601	20.7406	2.42546e-69	3.80112e-67	147.226
CD79A	2.63696	6.0621	14.5706	2.58365e-40	1.11433e-38	80.7192
PYHIN1	2.63384	4.19479	21.9806	2.33815e-75	6.40029e-73	161.016
ITK	2.6315	5.77801	21.4214	1.21257e-72	2.39367e-70	154.793
CD3E	2.63	7.41056	21.5551	2.72047e-73	5.81783e-71	156.281
CXCL11	2.60551	6.99124	17.2911	8.14682e-53	5.41276e-51	109.351
SLAMF6	2.59794	5.86132	21.309	4.25325e-72	7.79637e-70	153.544
ICOS	2.59744	4.37551	20.2147	8.51669e-67	1.1428e-64	141.392
FCRL5	2.59016	4.4912	13.8252	5.01132e-37	1.91945e-35	73.1948
CD3D	2.58839	5.845	21.8604	8.96359e-75	2.27188e-72	159.678
ADAMDEC1	2.58316	6.07691	15.0217	2.45248e-42	1.11393e-40	85.3497
CD96	2.57328	6.37328	21.3522	2.62649e-72	4.94696e-70	154.024
SLAMF1	2.56783	4.4125	21.3706	2.13791e-72	4.1407e-70	154.228
FCRL3	2.5588	3.30274	17.4692	1.17933e-53	8.12474e-52	111.274
GZMA	2.54789	6.08134	22.0892	6.94346e-76	2.1276e-73	162.225
UBD	2.54767	8.57338	14.0877	3.55216e-38	1.42433e-36	75.8252
CD2	2.54342	7.45263	22.077	7.95843e-76	2.40274e-73	162.089
UBASH3A	2.53558	4.05811	21.664	8.0519e-74	1.81654e-71	157.493
CD5	2.51032	6.25301	22.0168	1.559e-75	4.38442e-73	161.419
IRF4	2.50076	5.8188	17.3733	3.33994e-53	2.25556e-51	110.238
LY9	2.47845	4.63663	20.4044	1.0299e-67	1.46833e-65	143.495
CXCR3	2.47465	5.5295	22.4333	1.48015e-77	5.23921e-75	166.055
EOMES	2.47207	4.1699	19.2335	4.57947e-62	4.4984e-60	130.549
CXCL10	2.46573	8.81067	17.7608	4.92896e-55	3.60112e-53	114.434
AIM2	2.4657	4.08185	19.3699	1.01131e-62	1.04332e-60	132.052
NKG7	2.45145	6.01374	21.1793	1.81187e-71	3.17928e-69	152.101
CXCR2P1	2.45095	3.97856	13.452	2.08071e-35	7.52061e-34	69.4924
ZNF831	2.44866	4.29732	18.8642	2.71116e-60	2.50722e-58	126.487
SPIB	2.44105	3.8568	13.8619	3.46686e-37	1.33994e-35	73.561
TCL1A	2.43375	2.62186	14.1298	2.31851e-38	9.36988e-37	76.2492
ACAP1	2.42733	6.05248	22.6763	9.78926e-79	4.56758e-76	168.759
LOC96610	2.42674	12.4929	13.8744	3.05709e-37	1.18643e-35	73.686
IL2RG	2.42181	8.41235	24.4049	4.08998e-87	4.19837e-84	187.964
SIT1	2.41986	4.68214	21.0029	1.29925e-70	2.10028e-68	150.14
CD19	2.41626	2.71211	13.6096	4.33518e-36	1.60074e-34	71.0508
POU2AF1	2.41159	5.91663	13.8299	4.78105e-37	1.83811e-35	73.2416
GNLY	2.4006	5.17171	17.6638	1.41921e-54	1.02233e-52	113.381
CLEC10A	2.3922	4.97906	15.1198	8.84445e-43	4.08956e-41	86.3639
CTLA4	2.37368	4.40722	19.0851	2.36545e-61	2.29069e-59	128.915
SLA2	2.36808	5.07025	22.4407	1.36371e-77	4.91173e-75	166.137
CD27	2.36737	6.31514	19.9492	1.63336e-65	2.04469e-63	138.451
IL7R	2.36633	5.90313	15.8227	5.54163e-46	2.91717e-44	93.6988
SLAMF7	2.36472	7.69908	21.0304	9.55939e-71	1.57003e-68	150.445
MARCO	2.35857	4.31891	10.9528	3.67284e-25	9.24061e-24	46.0765
LCK	2.35557	6.63944	20.0377	6.1044e-66	7.83271e-64	139.431
CCL5	2.35493	8.94114	21.5631	2.48752e-73	5.37565e-71	156.37
PRKCB	2.34033	6.52313	21.2332	9.92411e-72	1.78721e-69	152.7
CTSW	2.34025	5.58047	18.155	6.61759e-57	5.20533e-55	118.724
LAX1	2.34004	4.82496	17.5963	2.95766e-54	2.08662e-52	112.651
ZAP70	2.32533	5.33178	19.173	8.951e-62	8.75067e-60	129.882
ZBP1	2.31348	4.8828	16.724	3.71715e-50	2.25779e-48	103.259
TBX21	2.3097	3.66127	21.1737	1.92944e-71	3.35689e-69	152.038
PDCD1	2.30903	4.18752	19.619	6.395e-64	7.29385e-62	134.801
THEMIS	2.30885	4.34512	18.374	5.98526e-58	4.95473e-56	121.115
SCML4	2.30855	3.96401	19.307	2.03109e-62	2.03406e-60	131.358
KLRB1	2.30819	4.52566	17.9352	7.33628e-56	5.57829e-54	116.33
CCR2	2.30589	5.82258	19.9467	1.67818e-65	2.08806e-63	138.424
CD247	2.30391	5.77888	20.054	5.09148e-66	6.5741e-64	139.612
BTLA	2.30374	3.69585	18.2675	1.92632e-57	1.55698e-55	119.952
FASLG	2.29994	3.75565	20.2789	4.16804e-67	5.74294e-65	142.103
CXCR6	2.29737	5.62734	21.7016	5.29163e-74	1.23451e-71	157.911
ZNF683	2.29531	4.57429	18.7496	9.59972e-60	8.56879e-58	125.229
TNFRSF9	2.29515	3.66673	21.0644	6.53536e-71	1.08202e-68	150.824
GPR171	2.29277	4.02353	19.7924	9.32644e-65	1.13297e-62	136.717
SAMD3	2.29039	4.1916	20.8695	5.75812e-70	9.16389e-68	148.658
PRF1	2.29006	6.04174	21.3679	2.20437e-72	4.2295e-70	154.198
C5orf20	2.28671	3.45523	18.2634	2.01564e-57	1.62091e-55	119.907
CD40LG	2.28589	3.86676	18.2929	1.45879e-57	1.19318e-55	120.229
CCL13	2.2843	3.48719	14.925	6.68697e-42	3.01722e-40	84.3523
ZBED2	2.28293	3.44124	17.1166	5.38868e-52	3.48989e-50	107.471
FCN1	2.28055	4.3651	16.2305	7.30993e-48	3.9913e-46	98.0042
GZMH	2.27789	4.36437	19.6176	6.48964e-64	7.3609e-62	134.786
FCRLA	2.2716	3.65851	15.0494	1.83999e-42	8.39445e-41	85.6354
KLRK1	2.2706	5.3501	19.5001	2.3892e-63	2.59526e-61	133.489
IL2RA	2.26459	4.71204	18.1246	9.23208e-57	7.17934e-55	118.392
TIFAB	2.25139	2.79799	19.793	9.26547e-65	1.13297e-62	136.724
LTA	2.24936	3.50412	20.6029	1.12721e-68	1.68917e-66	145.697
CLEC4E	2.22806	3.92072	16.2364	6.86248e-48	3.75698e-46	98.067
CD8B	2.21165	5.23232	16.7856	1.91601e-50	1.18481e-48	103.918
CD7	2.211	5.62256	20.0066	8.62412e-66	1.08622e-63	139.087
CCL18	2.20896	5.47659	11.2006	3.98923e-26	1.02888e-24	48.277
ADAM6	2.19671	13.458	12.0716	1.30521e-29	3.79546e-28	56.2371
PRKCQ	2.19333	4.50257	17.2359	1.48254e-52	9.72414e-51	108.755
PTPRC	2.19024	9.38238	23.2348	1.90504e-81	1.0864e-78	174.973
PLAC8	2.18818	4.18517	16.2285	7.46902e-48	4.06735e-46	97.9828
GPR174	2.18791	3.03688	18.4252	3.41091e-58	2.86992e-56	121.675
CCR5	2.18367	7.40826	24.8493	2.91533e-89	5.44107e-86	192.885
CD8A	2.18101	7.20865	19.3136	1.88842e-62	1.91927e-60	131.431
IGJ	2.18004	10.0452	10.3128	9.87681e-23	2.25803e-21	40.5345
LYZ	2.17413	11.1497	18.0646	1.78159e-56	1.36478e-54	117.738
KIAA0125	2.16956	3.36655	13.2507	1.52265e-34	5.32539e-33	67.5152
LGALS2	2.16547	3.52446	15.0561	1.71638e-42	7.86547e-41	85.7046
LTB	2.16328	6.12151	15.6345	4.04057e-45	2.08424e-43	91.7228
LAMP3	2.15983	6.98468	14.6791	8.47489e-41	3.7098e-39	81.8274
CCR7	2.14565	6.09082	16.6962	5.00646e-50	3.01415e-48	102.962
LAG3	2.14263	5.55557	16.4789	5.14891e-49	2.95271e-47	100.644
TNFRSF17	2.14056	3.53911	12.6512	5.24172e-32	1.6736e-30	61.7139
KIAA0748	2.13771	4.45096	19.4609	3.69251e-63	3.90759e-61	133.055
LOC400759	2.13472	3.62778	15.8313	5.0619e-46	2.67148e-44	93.7889
IL12RB1	2.11889	5.00172	23.4973	1.01544e-82	6.51467e-80	177.891
P2RY10	2.11791	4.78042	16.2259	7.67916e-48	4.17072e-46	97.9552
XCL2	2.11534	2.9577	19.6318	5.54774e-64	6.3986e-62	134.942
CHIT1	2.11531	5.44939	9.4319	1.52805e-19	3.1246e-18	33.2685
C4orf7	2.11257	4.17135	6.49866	1.96911e-10	2.29692e-09	12.623
CRTAM	2.11156	4.03725	21.6845	6.40783e-74	1.47812e-71	157.72
SP140	2.10773	5.82258	22.164	3.00824e-76	9.50142e-74	163.057
PTPN7	2.10359	6.92404	24.9766	7.08822e-90	1.6169e-86	194.292
CD6	2.10267	6.76979	21.6348	1.11566e-73	2.46286e-71	157.168
PTPRCAP	2.09967	6.60748	19.311	1.94219e-62	1.9642e-60	131.403
PSTPIP1	2.09729	5.52651	23.0549	1.42103e-80	7.48045e-78	172.972
CD48	2.06974	7.69838	24.2273	2.95521e-86	2.63784e-83	185.996
CST7	2.06516	6.13328	21.425	1.16457e-72	2.32123e-70	154.833
TBC1D10C	2.06443	5.81932	21.4637	7.55533e-73	1.55111e-70	155.264
IFNG	2.06193	1.91339	16.0526	4.85145e-47	2.62106e-45	96.1215
KLRD1	2.05782	4.36038	19.0114	5.34154e-61	5.10055e-59	128.104
IL2RB	2.05515	7.99193	18.5946	5.29178e-59	4.6034e-57	123.53
SNX20	2.05427	5.21333	23.7084	9.62225e-84	7.05517e-81	180.237
IL21R	2.05032	6.03739	19.6713	3.57794e-64	4.27064e-62	135.379
CD52	2.04892	7.83648	20.8111	1.1051e-69	1.7452e-67	148.009
XIRP1	2.04864	4.11886	13.3883	3.91056e-35	1.39867e-33	68.8656
GVIN1	2.04624	5.95356	19.0048	5.74343e-61	5.45891e-59	128.032
BANK1	2.04619	4.34585	13.8157	5.51613e-37	2.10104e-35	73.0994
C8orf80	2.04378	2.95647	16.8012	1.61928e-50	1.00434e-48	104.085
AOAH	2.04038	6.45152	20.6776	4.89957e-69	7.56301e-67	146.526
NCF1C	2.02593	4.42457	19.622	6.18639e-64	7.09534e-62	134.834
TLR8	2.02176	5.31145	19.4673	3.43894e-63	3.65811e-61	133.126
SPOCK2	2.02146	8.58697	19.2808	2.71243e-62	2.70321e-60	131.07
CXCR5	2.01616	3.86277	14.5959	1.99276e-40	8.66768e-39	80.9774
STAT4	2.01249	5.27595	17.4688	1.18363e-53	8.12709e-52	111.271
HLA.DOB	2.00951	5.4031	15.0721	1.45308e-42	6.67376e-41	85.8702
CCR4	2.00901	4.62591	16.5549	2.281e-49	1.33416e-47	101.454
GZMM	2.00813	3.65718	17.4024	2.43549e-53	1.65565e-51	110.553
BLK	2.00521	2.61219	12.4742	2.86609e-31	8.87492e-30	60.0272
AMICA1	2.00105	6.53636	20.0359	6.22928e-66	7.9433e-64	139.411
TOX	1.9972	5.2005	16.2432	6.38505e-48	3.51434e-46	98.1388
STAP1	1.99283	3.23853	16.3011	3.4426e-48	1.91018e-46	98.7533
C16orf54	1.98796	5.46389	19.6376	5.20083e-64	6.03238e-62	135.006
KCNA3	1.97549	4.10654	16.7717	2.22374e-50	1.35873e-48	103.77
PTPN22	1.96958	5.93347	21.6693	7.5891e-74	1.73116e-71	157.552
TNFSF12.TNFSF13	1.96904	5.79726	9.75803	1.0593e-20	2.26065e-19	35.9077
CCL8	1.96683	5.38326	14.2335	8.09183e-39	3.30927e-37	77.2955
CR1	1.96149	4.21099	13.6398	3.20879e-36	1.19126e-34	71.3498
IL18RAP	1.95327	2.76025	18.9118	1.6036e-60	1.50328e-58	127.01
PARP15	1.9527	3.54219	17.7081	8.7575e-55	6.35306e-53	113.862
CD69	1.94815	6.04446	17.6397	1.84492e-54	1.31973e-52	113.12
S1PR4	1.94719	4.48108	19.4716	3.27938e-63	3.5249e-61	133.173
SELL	1.94702	7.62804	16.5049	3.89761e-49	2.25402e-47	100.921
CR2	1.94038	2.98723	8.49513	2.2983e-16	4.01566e-15	26.0448
GBP4	1.94004	9.45694	18.4777	1.91443e-58	1.6514e-56	122.25
TNIP3	1.94004	2.37902	15.1151	9.28918e-43	4.28555e-41	86.3151
CYTIP	1.93055	7.22643	20.4291	7.81641e-68	1.13008e-65	143.769
SPN	1.9287	7.30458	24.0756	1.6016e-85	1.31523e-82	184.314
IL12RB2	1.92754	4.21582	9.2579	6.18975e-19	1.21954e-17	31.886
HLA.DQA1	1.92684	10.438	18.8591	2.86838e-60	2.64071e-58	126.431
WDFY4	1.92032	7.27599	19.4836	2.8707e-63	3.10187e-61	133.306
BCL2A1	1.90806	5.6897	16.3201	2.8102e-48	1.56776e-46	98.9552
MAP4K1	1.90381	6.33514	19.6692	3.66393e-64	4.32302e-62	135.355
IKZF3	1.89876	4.34642	12.8731	6.12654e-33	2.03524e-31	63.8455
HLA.DQA2	1.89738	8.10203	15.4979	1.69841e-44	8.46322e-43	90.2947
CIITA	1.89734	7.66896	21.885	6.80422e-75	1.7909e-72	159.953
NCF1	1.89431	6.24051	22.0689	8.71064e-76	2.59173e-73	161.999
SLFN12L	1.88362	3.23989	18.4417	2.844e-58	2.4328e-56	121.856
FCRL2	1.8836	2.19525	12.9285	3.57415e-33	1.19507e-31	64.3807
IKZF1	1.88249	7.99742	23.1667	4.07587e-81	2.26156e-78	174.216
PLEK	1.87893	8.62855	25.185	7.00539e-91	2.05458e-87	196.596
FOXP3	1.87644	5.99387	19.2397	4.27917e-62	4.22362e-60	130.617
S100A9	1.87416	8.09871	7.42963	4.76934e-13	6.81382e-12	18.5262
PNOC	1.87201	2.66337	14.783	2.90388e-41	1.27933e-39	82.8923
HLA.DQB2	1.87159	6.63172	14.4105	1.33137e-39	5.5896e-38	79.0893
GBP1	1.86906	10.0646	18.2717	1.84049e-57	1.49349e-55	119.997
CARD11	1.86446	6.46715	22.2029	1.94628e-76	6.34241e-74	163.491
LOC100233209	1.86247	3.86577	18.3648	6.62652e-58	5.4417e-56	121.014
FCER2	1.86022	1.77614	11.8464	1.07294e-28	3.05937e-27	54.1467
MAL	1.85721	3.25282	13.8191	5.32882e-37	2.03347e-35	73.1338
MEI1	1.85618	4.90532	18.6238	3.83826e-59	3.3675e-57	123.849
FYB	1.85584	8.55617	22.5097	6.29929e-78	2.53577e-75	166.906
CD79B	1.85412	5.64943	14.92	7.04186e-42	3.17038e-40	84.3009
MUC16	1.85327	5.62064	6.47864	2.22573e-10	2.58306e-09	12.5032
S100A8	1.85028	6.28787	7.28876	1.23523e-12	1.71346e-11	17.5917
DOK2	1.8404	6.36557	22.7441	4.58544e-79	2.18928e-76	169.514
TLR10	1.84025	4.34293	15.1974	3.94206e-43	1.84773e-41	87.1674
ARHGAP9	1.83903	6.61701	24.4447	2.62321e-87	2.99192e-84	188.406
FAM26F	1.83616	6.29346	18.032	2.54367e-56	1.94132e-54	117.384
FCRL1	1.83348	1.84833	12.614	7.49926e-32	2.38697e-30	61.3583
ABCD2	1.83214	3.71603	14.8169	2.04656e-41	9.05516e-40	83.2401
GPR183	1.83034	7.20218	19.5199	1.91787e-63	2.10556e-61	133.707
GFI1	1.83024	4.31372	17.8797	1.34539e-55	1.01175e-53	115.726
CD1C	1.8296	4.18462	12.22	3.21965e-30	9.51071e-29	57.6262
GPR114	1.8296	4.39601	14.2298	8.40233e-39	3.42942e-37	77.258
XCL1	1.82474	2.91024	15.9495	1.4485e-46	7.70409e-45	95.0334
SLAMF8	1.8245	8.28577	21.4411	9.72319e-73	1.97641e-70	155.013
FUT7	1.82231	3.30004	20.2039	9.60729e-67	1.2725e-64	141.272
LILRA4	1.81803	3.97099	14.8653	1.24041e-41	5.53602e-40	83.738
CD226	1.81794	4.26404	20.3198	2.64342e-67	3.66685e-65	142.556
HK3	1.81631	5.43563	14.7108	6.11363e-41	2.6819e-39	82.1521
CLEC12A	1.81496	3.62668	15.1785	4.80106e-43	2.24013e-41	86.9714
CD1E	1.81324	4.12049	12.1777	4.80219e-30	1.41043e-28	57.2294
LILRB2	1.80721	6.54901	23.5165	8.19058e-83	5.42428e-80	178.105
BCL11B	1.80314	6.09762	13.2973	9.60992e-35	3.37828e-33	67.9724
MRC1	1.80239	6.60759	14.1061	2.94938e-38	1.18727e-36	76.01
PLA2G2A	1.80153	5.09601	7.18824	2.41514e-12	3.27064e-11	16.9336
CYBB	1.79993	9.72486	21.0893	4.95111e-71	8.47052e-69	151.1
NAPSB	1.79741	6.95923	16.3831	1.43502e-48	8.1384e-47	99.6238
EVI2B	1.79677	8.29994	24.6007	4.6272e-88	6.33309e-85	190.133
VNN2	1.79574	4.43766	16.6112	1.24706e-49	7.37812e-48	102.054
CD244	1.79488	3.30908	19.7384	1.69822e-64	2.05085e-62	136.121
TAGAP	1.79335	7.04305	21.5076	4.62515e-73	9.7891e-71	155.752
CCL21	1.79211	5.95932	8.09641	4.37777e-15	7.20735e-14	23.1405
NCKAP1L	1.79137	8.62078	24.7309	1.0868e-88	1.71631e-85	191.575
DOCK2	1.78607	8.32819	22.4957	7.36819e-78	2.85413e-75	166.75
CD84	1.78554	6.60145	17.7993	3.23707e-55	2.37346e-53	114.852
IL10RA	1.78488	8.47271	24.8923	1.80833e-89	3.71251e-86	193.36
CCR8	1.78389	3.20192	14.576	2.44531e-40	1.05689e-38	80.7739
SASH3	1.78353	8.02795	25.5472	1.26415e-92	5.19061e-89	200.592
PTGDS	1.77975	7.23801	12.2582	2.24241e-30	6.70113e-29	57.9852
GRAP2	1.77837	5.00294	17.3049	7.02017e-53	4.69459e-51	109.499
CCL4	1.77461	6.30545	19.4287	5.27432e-63	5.55291e-61	132.7
TMEM150B	1.77417	2.72262	17.1393	4.21987e-52	2.75029e-50	107.714
GPR18	1.77169	3.54779	17.5723	3.84027e-54	2.69081e-52	112.391
CP	1.7701	7.92067	5.94932	5.0776e-09	5.09497e-08	9.45244
KLHDC7B	1.75698	6.5968	9.80957	6.90951e-21	1.48536e-19	36.3303
PDCD1LG2	1.75447	5.93009	20.4594	5.58009e-68	8.1828e-66	144.105
HCST	1.75245	6.41572	22.5456	4.22003e-78	1.76811e-75	167.305
CD53	1.74991	9.2773	27.0142	1.19209e-99	2.44737e-95	216.69
C11orf21	1.7479	2.7189	18.1928	4.37206e-57	3.45224e-55	119.136
CD28	1.74548	5.6542	18.3759	5.86504e-58	4.87487e-56	121.136
TRAF3IP3	1.74271	6.60497	20.4468	6.41674e-68	9.34296e-66	143.966
NCR3	1.74118	2.38331	14.8762	1.10832e-41	4.96809e-40	83.8499
FGL2	1.73938	8.91738	20.0096	8.3452e-66	1.05757e-63	139.12
BIN2	1.73904	7.22917	22.4512	1.21207e-77	4.52431e-75	166.254
FCRL6	1.73699	3.4689	15.8359	4.82462e-46	2.55282e-44	93.8366
HLA.DRA	1.73246	13.4432	24.5167	1.17829e-87	1.51189e-84	189.203
IRF8	1.73238	7.87401	20.5504	2.02369e-68	3.01061e-66	145.114
RARRES1	1.72561	8.26914	9.67558	2.09181e-20	4.40913e-19	35.2347
JAK3	1.72538	7.47721	19.5707	1.09273e-63	1.22589e-61	134.267
LILRB4	1.72532	8.19744	21.8858	6.74484e-75	1.7909e-72	159.961
CSF2RB	1.71969	7.74963	19.4024	7.05783e-63	7.39271e-61	132.411
CCL17	1.71782	2.94938	13.0039	1.71268e-33	5.8022e-32	65.1113
TFEC	1.7175	6.90393	21.0741	5.86397e-71	9.78759e-69	150.932
C2orf89	1.71652	3.87234	15.5901	6.44289e-45	3.28219e-43	91.2587
CD200R1	1.7148	3.96325	18.0957	1.2675e-56	9.81957e-55	118.077
KLHL6	1.71233	6.96368	21.7361	3.59837e-74	8.59006e-72	158.295
TNFRSF8	1.70929	4.08782	18.8916	2.00348e-60	1.86961e-58	126.788
HLA.DRB6	1.70927	7.54978	13.0072	1.65864e-33	5.6284e-32	65.1431
HLA.DQB1	1.70876	10.4747	16.9964	1.9757e-51	1.25576e-49	106.178
HLA.DPA1	1.70824	12.1472	22.5465	4.17776e-78	1.76811e-75	167.315
BIRC3	1.70742	8.20333	15.8044	6.72494e-46	3.53103e-44	93.5063
IL4I1	1.70637	7.17997	17.0782	8.16206e-52	5.25289e-50	107.058
TNFRSF13B	1.70588	2.15735	12.8035	1.20329e-32	3.97162e-31	63.1752
SCARA5	1.70518	3.77582	8.26242	1.29975e-15	2.18541e-14	24.3368
HSD11B1	1.70331	4.92812	13.5509	7.78679e-36	2.85469e-34	70.4689
EBI3	1.70195	4.83206	18.441	2.86614e-58	2.44157e-56	121.848
LOC100188949	1.70155	2.56738	18.4596	2.33695e-58	2.00743e-56	122.051
CARD16	1.7001	6.4425	18.6607	2.55604e-59	2.25217e-57	124.254
GPR55	1.69923	3.18196	12.9601	2.62628e-33	8.82447e-32	64.6867
MPEG1	1.69753	9.08439	22.4003	2.14237e-77	7.45474e-75	165.687
LILRB1	1.69507	6.66378	23.4566	1.59953e-82	9.95103e-80	177.439
PI16	1.69468	4.89623	6.99575	8.54503e-12	1.10821e-10	15.6943
PLA2G7	1.6924	6.70427	13.6252	3.71118e-36	1.3728e-34	71.2053
KCNJ10	1.69231	3.74858	13.5355	9.07399e-36	3.32066e-34	70.3169
SLC2A5	1.6912	5.84502	15.285	1.5787e-43	7.53737e-42	88.0774
SH2D2A	1.69082	5.57729	14.472	7.09805e-40	3.0046e-38	79.7146
LBP	1.68911	4.38432	6.24345	9.1728e-10	9.98503e-09	11.1203
HLA.DRB5	1.68188	9.8506	13.8029	6.27135e-37	2.37548e-35	72.9719
APOBEC3H	1.6805	2.76907	18.7314	1.17269e-59	1.04222e-57	125.029
C17orf87	1.67996	4.11236	20.9107	3.63748e-70	5.83417e-68	149.115
RLTPR	1.67858	4.86895	10.3264	8.78876e-23	2.01376e-21	40.6501
PIK3CG	1.67671	6.24387	17.8509	1.84271e-55	1.36574e-53	115.413
HLA.DOA	1.67531	8.75765	20.0604	4.73893e-66	6.15761e-64	139.683
AQP9	1.67083	5.12952	9.16894	1.25687e-18	2.45049e-17	31.1861
IFI44L	1.66929	9.20254	12.181	4.655e-30	1.36916e-28	57.2603
KLRC1	1.66856	2.29212	13.8265	4.94792e-37	1.89871e-35	73.2075
FPR3	1.66683	8.84439	18.366	6.53383e-58	5.38713e-56	121.028
CD37	1.66542	8.15449	23.445	1.82104e-82	1.09959e-79	177.31
PATL2	1.66342	2.73419	15.2371	2.60552e-43	1.23252e-41	87.5792
TMC8	1.66279	7.34612	21.5	5.03512e-73	1.05481e-70	155.668
C1QB	1.6604	10.5366	22.6504	1.30694e-78	5.96257e-76	168.472
WNT10A	1.66036	3.94022	13.3276	7.1301e-35	2.52381e-33	68.2689
LOC400696	1.65967	2.65118	10.2602	1.54931e-22	3.51074e-21	40.0887
RUFY4	1.65667	2.91409	12.4783	2.75694e-31	8.56277e-30	60.0658
ARHGAP15	1.65564	5.96162	19.6674	3.73701e-64	4.38405e-62	135.335
CD1B	1.65515	1.85764	12.5743	1.09826e-31	3.4688e-30	60.9796
MIR155HG	1.65214	3.84352	17.8556	1.75071e-55	1.30225e-53	115.464
HLA.DRB1	1.65033	11.7324	19.3703	1.00762e-62	1.04332e-60	132.056
C3	1.64867	12.6673	16.0647	4.26552e-47	2.31058e-45	96.2495
CD80	1.64652	4.46132	17.4575	1.33864e-53	9.16078e-52	111.148
EPSTI1	1.64522	7.74501	18.2125	3.52428e-57	2.79357e-55	119.351
HLA.DMB	1.64501	9.65968	24.1958	4.19866e-86	3.5916e-83	185.646
TMEM156	1.6446	4.27295	12.5825	1.01505e-31	3.2159e-30	61.0578
LRMP	1.64307	5.68737	16.7669	2.34324e-50	1.4275e-48	103.718
IL1R2	1.64069	3.02734	11.5149	2.29268e-27	6.177e-26	51.1094
DARC	1.63925	6.99393	7.72148	6.35377e-14	9.6339e-13	20.5076
RUNX3	1.63473	7.906	16.3749	1.56561e-48	8.83022e-47	99.5372
FPR2	1.63415	2.19494	14.5688	2.63261e-40	1.13307e-38	80.7006
C1QA	1.63409	10.3972	23.5573	5.19653e-83	3.55616e-80	178.558
CD74	1.63182	14.8771	23.087	9.93088e-81	5.36529e-78	173.329
CD4	1.62747	10.0023	26.5313	2.40798e-97	2.47179e-93	211.408
FGD2	1.62568	6.32488	22.1006	6.11171e-76	1.90111e-73	162.352
HLA.DPB1	1.61925	11.4091	22.8557	1.31639e-79	6.5916e-77	170.756
CD163	1.61905	9.25899	16.4174	9.94337e-49	5.65477e-47	99.9888
LILRA5	1.61736	3.88057	17.6283	2.08758e-54	1.48297e-52	112.997
CD86	1.61314	7.67003	25.0767	2.33189e-90	5.98421e-87	195.399
CLEC7A	1.61098	7.25614	15.5491	9.92042e-45	4.99791e-43	90.8294
SAMSN1	1.60644	7.06118	22.0248	1.4255e-75	4.06465e-73	161.509
IL12B	1.60628	1.92298	15.38	5.84905e-44	2.85894e-42	89.0649
MNDA	1.60617	7.41005	22.8915	8.8248e-80	4.52933e-77	171.155
RGS18	1.60581	4.52241	18.386	5.24681e-58	4.37874e-56	121.246
NCF1B	1.6054	4.13636	17.7174	7.90603e-55	5.75571e-53	113.964
CTSS	1.603	10.5607	21.7515	3.03e-74	7.40546e-72	158.466
MYO1G	1.60232	6.87508	17.8252	2.43968e-55	1.79522e-53	115.134
CORO1A	1.60207	9.4212	22.4886	7.97936e-78	3.03364e-75	166.671
PAX5	1.60026	2.16192	9.46396	1.17855e-19	2.42441e-18	33.5252
CSF2RA	1.59912	6.73482	19.1628	1.00183e-61	9.7477e-60	129.77
LCP2	1.59873	8.35794	26.204	8.88474e-96	6.08013e-92	207.817
ITGB2	1.59865	10.3956	22.4419	1.34486e-77	4.91173e-75	166.151
ABI3BP	1.59701	7.73583	10.8681	7.79111e-25	1.93178e-23	45.3312
WAS	1.59466	7.14347	25.2671	2.81946e-91	9.64724e-88	197.502
P2RX1	1.59207	3.58323	12.9049	4.49584e-33	1.50081e-31	64.1528
CHI3L1	1.58891	9.10621	7.91072	1.66639e-14	2.64791e-13	21.8244
TREML2	1.58751	2.19241	15.5064	1.55312e-44	7.75803e-43	90.3836
LAT	1.58575	6.37408	19.2685	3.11002e-62	3.08448e-60	130.934
MGC29506	1.58426	7.2787	8.63974	7.69566e-17	1.37624e-15	27.124
IPCEF1	1.58387	5.4616	16.7788	2.06169e-50	1.26726e-48	103.845
IL32	1.58273	9.76161	15.3797	5.8627e-44	2.85894e-42	89.0626
APOBEC3G	1.57994	7.68631	18.7497	9.58796e-60	8.56879e-58	125.23
FAM65B	1.57898	6.53317	14.0372	5.92279e-38	2.34739e-36	75.317
SRGN	1.57573	9.80448	22.5001	7.01766e-78	2.77063e-75	166.798
TNFSF13B	1.57162	6.18829	19.5616	1.20828e-63	1.34816e-61	134.167
DTHD1	1.57074	1.75029	15.3601	7.20175e-44	3.5036e-42	88.858
JAKMIP1	1.57023	3.94624	9.57739	4.68036e-20	9.7551e-19	34.4383
ASB2	1.569	4.30363	15.293	1.45313e-43	6.95401e-42	88.1599
CLECL1	1.56745	3.04127	17.4833	1.01151e-53	6.99201e-52	111.427
CXorf21	1.56651	5.40982	21.0818	5.38232e-71	9.13214e-69	151.017
CHRDL1	1.56549	6.67218	7.58307	1.66491e-13	2.45198e-12	19.5604
ACY3	1.56512	2.83854	9.3285	3.51645e-19	7.0432e-18	32.4447
IGSF6	1.56444	6.62693	20.3788	1.36919e-67	1.9253e-65	143.211
MMP7	1.56358	8.79493	7.38403	6.49991e-13	9.17765e-12	18.2221
SLA	1.56161	8.26239	21.0791	5.54749e-71	9.33525e-69	150.987
LILRA6	1.56139	5.41233	15.2428	2.45309e-43	1.16309e-41	87.6391
CCR1	1.5594	7.73283	19.5145	2.03737e-63	2.22485e-61	133.647
LILRB3	1.5573	5.45985	18.8316	3.88746e-60	3.54709e-58	126.128
TARP	1.55645	3.75376	8.37423	5.67821e-16	9.76329e-15	25.153
HCLS1	1.55569	9.19432	24.434	2.9552e-87	3.19317e-84	188.288
XPNPEP2	1.55324	3.23582	11.7081	3.87364e-28	1.07613e-26	52.8731
BTK	1.55319	7.1049	22.3817	2.63768e-77	9.02527e-75	165.48
PSMB9	1.55011	8.76049	17.2474	1.30881e-52	8.61214e-51	108.879
TIMD4	1.54872	2.10533	12.6701	4.37024e-32	1.40189e-30	61.8945
FERMT3	1.54847	8.32187	26.0404	5.40432e-95	2.77377e-91	206.021
LILRB5	1.54784	4.72714	12.5007	2.22468e-31	6.9306e-30	60.2787
ADH1B	1.54747	6.89499	4.71558	3.13364e-06	1.99114e-05	3.23551
SIGLEC10	1.5457	6.97984	20.6192	9.3899e-69	1.41746e-66	145.879
SELP	1.54513	5.99425	8.33507	7.59565e-16	1.29195e-14	24.8663
CCL2	1.54292	8.32157	15.3477	8.20322e-44	3.98137e-42	88.7285
BATF2	1.53863	6.40082	11.4131	5.81059e-27	1.55327e-25	50.1872
KIR2DL4	1.53363	1.4778	13.3355	6.59072e-35	2.33692e-33	68.347
CCL11	1.53144	4.0718	12.3273	1.16324e-30	3.52336e-29	58.6367
S100A7	1.53051	3.47961	4.14991	3.91162e-05	0.000197651	0.824401
ITGAL	1.52949	8.73385	15.6063	5.43571e-45	2.78292e-43	91.4278
APOBEC3A	1.52927	4.14203	10.8933	6.23146e-25	1.54881e-23	45.5525
CD300LF	1.52834	5.33549	21.6394	1.0601e-73	2.36564e-71	157.219
ITGB7	1.52529	6.92204	15.4953	1.74558e-44	8.67716e-43	90.2674
RASAL3	1.52307	6.88031	21.3438	2.88463e-72	5.38377e-70	153.93
TNFSF14	1.52187	2.28967	16.4924	4.45551e-49	2.56943e-47	100.787
RHOF	1.52051	6.68392	12.7097	2.98096e-32	9.6074e-31	62.2743
CD209	1.52015	5.35998	13.365	4.9259e-35	1.75571e-33	68.6363
ZNF80	1.51894	1.8852	14.8148	2.09039e-41	9.22918e-40	83.2191
HTRA4	1.51836	2.80634	14.1602	1.70331e-38	6.89724e-37	76.5557
CCL22	1.51706	6.44264	12.7495	2.02946e-32	6.60297e-31	62.6561
ADIPOQ	1.51571	6.64308	4.59408	5.51351e-06	3.35385e-05	2.69373
MS4A4A	1.51428	7.22331	19.3105	1.95383e-62	1.96628e-60	131.397
CNR2	1.51007	1.57762	13.0178	1.49512e-33	5.09879e-32	65.2462
APBB1IP	1.5065	7.91398	21.4917	5.52826e-73	1.14642e-70	155.575
SIGLEC1	1.5032	8.12725	16.382	1.45226e-48	8.21347e-47	99.6119
SIGLEC14	1.5028	4.98954	11.1226	8.04899e-26	2.06042e-24	47.5811
CD274	1.50147	4.47257	15.4857	1.93052e-44	9.57334e-43	90.1673
TNFRSF1B	1.49749	9.21977	24.2553	2.16256e-86	2.01806e-83	186.307
SELE	1.49748	6.48201	10.2893	1.20771e-22	2.74577e-21	40.3354
MCOLN2	1.49734	5.5239	14.4484	9.04122e-40	3.81927e-38	79.474
EMR1	1.49652	3.72089	15.2553	2.15396e-43	1.02601e-41	87.7685
SELPLG	1.49598	8.81915	23.3001	9.1868e-82	5.38871e-79	175.699
ARHGAP25	1.49537	7.84139	22.6166	1.90743e-78	8.51294e-76	168.095
C1QC	1.49287	10.5149	21.8691	8.12888e-75	2.08607e-72	159.776
VAV1	1.49219	7.28778	18.1466	7.25868e-57	5.68781e-55	118.632
HLA.DMA	1.48797	9.98677	22.8184	1.9986e-79	9.76936e-77	170.341
SEPT1	1.48545	6.32201	16.7722	2.21379e-50	1.35669e-48	103.774
ETV7	1.48483	6.26844	12.654	5.10165e-32	1.63141e-30	61.7408
MYO1F	1.484	8.1181	24.492	1.55067e-87	1.87266e-84	188.93
FGR	1.48327	7.044	21.5811	2.03401e-73	4.44236e-71	156.57
ZC3H12D	1.47975	3.18511	15.5541	9.41548e-45	4.77284e-43	90.8814
LST1	1.47944	6.46969	22.5099	6.28515e-78	2.53577e-75	166.908
MATK	1.47846	5.19477	11.2833	1.88962e-26	4.9482e-25	49.0178
P2RY8	1.47749	6.6508	17.6318	2.01064e-54	1.43328e-52	113.035
DNASE1L3	1.47674	3.15293	9.42701	1.5897e-19	3.24741e-18	33.2294
PTAFR	1.47592	6.36426	15.961	1.28266e-46	6.83976e-45	95.1544
RASGRP2	1.4714	5.04985	14.0731	4.11872e-38	1.64508e-36	75.6781
RSAD2	1.47029	8.90045	12.1686	5.23421e-30	1.53293e-28	57.1439
CYTH4	1.46743	7.88437	23.9998	3.7312e-85	2.94622e-82	183.472
GPR84	1.46613	4.81831	15.4184	3.91228e-44	1.91692e-42	89.4648
P2RY13	1.46605	5.88928	14.3757	1.89969e-39	7.95931e-38	78.7359
A2ML1	1.46579	3.55978	4.96162	9.60998e-07	6.83384e-06	4.3721
GIMAP5	1.46406	7.76235	18.4186	3.66796e-58	3.0736e-56	121.603
LAIR1	1.46121	8.60907	23.8518	1.9421e-84	1.47671e-81	181.83
MS4A6A	1.46086	9.12739	22.3356	4.4151e-77	1.46197e-74	164.968
PIK3AP1	1.45945	8.4018	18.8136	4.73793e-60	4.28501e-58	125.931
NLRC5	1.45753	9.0067	17.4048	2.37422e-53	1.61936e-51	110.578
NCF4	1.45486	6.78908	24.8269	3.73716e-89	6.39366e-86	192.638
CD72	1.45476	5.7771	17.8758	1.40457e-55	1.0524e-53	115.683
FAM20A	1.45416	7.25237	14.8437	1.55157e-41	6.89477e-40	83.5154
HAPLN3	1.45391	8.03766	11.3181	1.37916e-26	3.64403e-25	49.3301
POU2F2	1.44696	6.1454	17.8925	1.16972e-55	8.86137e-54	115.865
SOCS1	1.44353	5.47571	14.9831	3.6618e-42	1.65953e-40	84.9511
RGL4	1.4425	2.69511	15.2972	1.39023e-43	6.68419e-42	88.2039
F5	1.44219	5.22914	11.3712	8.51457e-27	2.2643e-25	49.8083
MMP12	1.44089	4.60203	6.34417	5.02747e-10	5.60336e-09	11.7072
ITGAX	1.44066	8.25418	20.4114	9.51993e-68	1.36674e-65	143.573
PARVG	1.43982	7.42735	22.047	1.11241e-75	3.26253e-73	161.755
VNN1	1.43925	4.67463	13.3115	8.35615e-35	2.9527e-33	68.1113
CECR1	1.43871	9.93965	17.2559	1.194e-52	7.90739e-51	108.971
SAA2	1.43657	5.74692	6.45814	2.52235e-10	2.91247e-09	12.381
CASP1	1.43244	8.0356	17.5225	6.60811e-54	4.58326e-52	111.851
SUCNR1	1.4319	3.16639	13.3406	6.26794e-35	2.22631e-33	68.3969
C1S	1.43158	12.3022	14.5835	2.26464e-40	9.80868e-39	80.8502
GPR65	1.43079	6.40496	20.6962	3.9799e-69	6.18995e-67	146.733
BCL2L14	1.42904	3.91222	8.83365	1.73832e-17	3.19782e-16	28.5921
IL22RA2	1.42865	2.23708	8.31237	8.98745e-16	1.52112e-14	24.7004
COL4A4	1.42681	5.01605	10.8539	8.83922e-25	2.18374e-23	45.2061
ARHGAP30	1.42675	8.83206	21.9842	2.24622e-75	6.23174e-73	161.056
CD70	1.42607	2.93908	12.0972	1.0264e-29	2.99319e-28	56.4755
CASS4	1.42468	4.31076	16.8935	5.99543e-51	3.7641e-49	105.074
VCAM1	1.42248	9.16833	14.3606	2.21609e-39	9.2472e-38	78.5828
PROM1	1.421	7.91399	4.76731	2.45435e-06	1.60063e-05	3.47012
CD1A	1.41802	3.11917	7.48137	3.3507e-13	4.84095e-12	18.8731
IL10	1.41625	3.35344	17.3235	5.73462e-53	3.84745e-51	109.7
DNAJC5B	1.41426	3.45864	11.7597	2.40206e-28	6.76464e-27	53.3472
C1orf38	1.41403	8.11599	20.2289	7.27245e-67	9.8226e-65	141.549
HLA.F	1.41386	9.88112	15.4414	3.07425e-44	1.52083e-42	89.7046
TNFSF8	1.41382	5.11942	17.5336	5.85138e-54	4.07217e-52	111.972
SPI1	1.41346	8.3958	24.2631	1.98316e-86	1.93878e-83	186.393
CD177	1.41288	3.35614	6.79376	3.12587e-11	3.89642e-10	14.4236
CD180	1.41164	6.79742	16.5599	2.1619e-49	1.26811e-47	101.507
IL18R1	1.40879	5.16244	15.1823	4.61327e-43	2.15741e-41	87.0111
EVI2A	1.40816	7.76673	20.2439	6.15136e-67	8.3634e-65	141.716
DPEP2	1.40729	4.7309	18.6199	4.00527e-59	3.49907e-57	123.807
EPYC	1.40726	4.42335	6.43095	2.97612e-10	3.40009e-09	12.2193
LOC606724	1.4045	4.33753	16.7089	4.37094e-50	2.63928e-48	103.097
CLEC4A	1.40373	5.36989	20.2102	8.94849e-67	1.19294e-64	141.342
C7	1.40306	6.4504	5.47614	6.90567e-08	5.90231e-07	6.91677
SIGLEC7	1.40146	5.08892	19.9411	1.78636e-65	2.20928e-63	138.362
INPP5D	1.40132	8.55553	20.4032	1.04332e-67	1.4772e-65	143.482
RASSF4	1.40111	8.68882	18.2414	2.56603e-57	2.04189e-55	119.667
PIK3R5	1.39968	7.21467	21.7851	2.08005e-74	5.20774e-72	158.84
PIK3CD	1.39888	8.0242	19.5295	1.72597e-63	1.90506e-61	133.812
TNFAIP8L2	1.39727	6.14031	21.777	2.27608e-74	5.62986e-72	158.751
PDE3B	1.39724	6.2477	9.91862	2.78415e-21	6.06137e-20	37.2296
S100B	1.3971	5.42445	6.82333	2.59013e-11	3.25231e-10	14.6077
FCGR2B	1.39487	7.34563	15.7844	8.30743e-46	4.33974e-44	93.2961
CDHR1	1.39439	2.8971	10.5284	1.53478e-23	3.64266e-22	42.3783
NCF2	1.39288	8.00684	19.3885	8.23145e-63	8.57825e-61	132.257
FPR1	1.39282	6.28763	15.6748	2.64267e-45	1.37005e-43	92.1451
TUSC5	1.39231	4.55589	5.04616	6.32864e-07	4.63694e-06	4.77471
VPREB3	1.392	2.83441	10.0049	1.35063e-21	2.95611e-20	37.9454
PPP1R16B	1.39188	7.19839	12.9628	2.55844e-33	8.61061e-32	64.7127
XAF1	1.39068	9.544	13.798	6.58622e-37	2.49015e-35	72.9233
ART3	1.38871	2.24904	5.60219	3.50599e-08	3.13356e-07	7.57422
LAPTM5	1.38846	11.8128	24.6804	1.90667e-88	2.79599e-85	191.016
FCGR1A	1.38662	6.75136	18.4336	3.11206e-58	2.6401e-56	121.766
MEOX1	1.38612	5.35253	8.2992	9.90669e-16	1.67395e-14	24.6044
EGFL6	1.38433	5.77827	10.0162	1.22787e-21	2.69606e-20	38.0397
HCK	1.38334	8.08662	18.8137	4.73724e-60	4.28501e-58	125.932
GIMAP7	1.38303	7.43169	16.2446	6.29063e-48	3.47168e-46	98.1536
PLCXD2	1.383	4.38917	13.4319	2.53815e-35	9.15785e-34	69.295
RGS1	1.38226	9.32255	11.788	1.84722e-28	5.22362e-27	53.6078
SIGLEC5	1.3819	4.8254	16.2697	4.81161e-48	2.6626e-46	98.4202
IL33	1.38028	6.66749	7.86197	2.35786e-14	3.71218e-13	21.4828
FABP4	1.37813	7.55314	5.10825	4.6391e-07	3.47847e-06	5.07433
C10orf128	1.37686	3.35161	13.9133	2.06665e-37	8.1125e-36	74.0751
C1orf162	1.37388	7.49355	21.8836	6.91334e-75	1.79659e-72	159.937
CPVL	1.37168	8.20901	17.1262	4.85976e-52	3.15731e-50	107.574
PDE6G	1.37115	3.50284	16.4836	4.89649e-49	2.81583e-47	100.694
SLC7A7	1.371	8.36488	22.0352	1.2692e-75	3.66996e-73	161.624
AIF1	1.36873	8.30023	23.6632	1.59351e-83	1.12809e-80	179.735
TLR7	1.3686	7.14696	15.3174	1.12626e-43	5.45334e-42	88.4133
CLEC17A	1.36425	1.80756	10.9313	4.44681e-25	1.11605e-23	45.8869
SAA1	1.36411	7.55004	6.25615	8.50661e-10	9.28446e-09	11.1939
OASL	1.36253	7.77059	10.0825	7.01529e-22	1.55198e-20	38.5937
GAB3	1.35842	6.02649	21.1351	2.96748e-71	5.11952e-69	151.61
SAMD9L	1.35639	9.58005	13.8243	5.05997e-37	1.93447e-35	73.1852
IL1B	1.35542	5.76737	12.247	2.49468e-30	7.42257e-29	57.8794
CCL3	1.3551	6.33412	13.8917	2.56997e-37	1.00117e-35	73.8585
IFIT3	1.35489	9.83932	11.9983	2.5991e-29	7.52603e-28	55.5535
FAM129C	1.35401	2.11629	10.5417	1.36757e-23	3.24956e-22	42.4925
CADM3	1.35394	4.72051	7.49336	3.0868e-13	4.47227e-12	18.9537
ACSL5	1.35358	8.51549	13.8128	5.67512e-37	2.15759e-35	73.0712
KYNU	1.3528	7.07696	9.24338	6.95069e-19	1.36422e-17	31.7714
CSF1R	1.35267	9.75634	19.6398	5.07238e-64	5.91682e-62	135.031
FREM1	1.35195	4.6692	8.59804	1.05645e-16	1.87458e-15	26.8114
IL6	1.35127	3.96875	7.87326	2.17614e-14	3.42871e-13	21.5617
CELF2	1.35075	8.69579	16.2426	6.42854e-48	3.52882e-46	98.132
IFI44	1.35061	8.8292	12.0105	2.31783e-29	6.73055e-28	55.6672
GTSF1	1.35003	2.11499	8.00582	8.42767e-15	1.36344e-13	22.4955
RCSD1	1.34903	8.00362	16.5646	2.05565e-49	1.20924e-47	101.557
PLCB2	1.34399	7.56776	20.4838	4.24892e-68	6.27556e-66	144.376
PTGER4	1.34388	7.08818	17.8344	2.20653e-55	1.6295e-53	115.234
RAC2	1.34221	9.16549	16.5125	3.59269e-49	2.08355e-47	101.002
KIR3DL2	1.34168	1.19085	14.2669	5.75908e-39	2.37895e-37	77.6335
FCGR3A	1.33878	10.4306	16.5428	2.59853e-49	1.51556e-47	101.324
APOL1	1.33868	10.3953	16.916	4.7032e-51	2.96186e-49	105.315
VGLL1	1.33843	3.53176	4.61251	5.06468e-06	3.10197e-05	2.77508
IL15RA	1.33694	7.17857	18.5229	1.16466e-58	1.00888e-56	122.744
KIF19	1.33312	2.77483	9.07933	2.5533e-18	4.89899e-17	30.486
TXK	1.33227	2.56563	12.5322	1.64455e-31	5.1783e-30	60.5787
GRAMD1B	1.33109	3.81369	12.5756	1.08498e-31	3.43215e-30	60.9916
FCER1G	1.33031	8.94309	22.3497	3.76889e-77	1.26845e-74	165.125
HLA.DPB2	1.32954	2.68308	12.719	2.72658e-32	8.80136e-31	62.3629
ADAM28	1.32924	6.37668	12.221	3.1893e-30	9.43464e-29	57.6356
NFAM1	1.32883	7.5284	17.1988	2.21492e-52	1.44816e-50	108.356
FAM78A	1.32856	7.22883	22.5786	2.91798e-78	1.2746e-75	167.672
STX11	1.32814	6.46591	18.2718	1.83943e-57	1.49349e-55	119.998
ITGAD	1.32782	2.39496	10.9508	3.74041e-25	9.3991e-24	46.0584
PCOLCE2	1.3275	4.86933	6.35101	4.82501e-10	5.39528e-09	11.7474
IL15	1.32677	5.28432	15.1624	5.67409e-43	2.6355e-41	86.8053
SEL1L3	1.32651	8.90171	11.6134	9.27597e-28	2.54253e-26	52.0069
OSM	1.32533	4.95879	11.6189	8.81971e-28	2.42395e-26	52.057
IFI27	1.3246	10.8361	8.74093	3.55119e-17	6.44614e-16	27.8871
HAVCR2	1.3235	8.34714	22.1938	2.15425e-76	6.91043e-74	163.39
EMILIN2	1.32241	7.82015	19.0029	5.86241e-61	5.54633e-59	128.011
MX1	1.3215	11.0313	9.26993	5.62234e-19	1.11308e-17	31.981
CAPN6	1.31537	5.03803	5.09801	4.88406e-07	3.65148e-06	5.02467
APOC1	1.31395	9.77516	14.424	1.15993e-39	4.87979e-38	79.2263
TRIM22	1.31324	9.65895	16.5206	3.29357e-49	1.9155e-47	101.088
P2RY6	1.30932	6.14518	13.8857	2.72878e-37	1.06102e-35	73.7989
SIRPB2	1.30849	5.54769	17.0096	1.71383e-51	1.0927e-49	106.32
DHRS9	1.30835	4.1465	9.58972	4.23172e-20	8.84697e-19	34.5379
SLC12A3	1.30772	1.88312	11.7584	2.42972e-28	6.83318e-27	53.3358
FMNL1	1.30738	8.82027	21.9613	2.89938e-75	7.83213e-73	160.802
IGF2BP2	1.30708	5.28833	7.79825	3.70263e-14	5.69827e-13	21.0388
COL6A6	1.30658	4.28174	8.06703	5.41714e-15	8.86873e-14	22.9307
OAS2	1.3062	10.6921	11.2419	2.74773e-26	7.12259e-25	48.6466
GPR126	1.30602	7.45353	7.67996	8.49413e-14	1.27942e-12	20.2221
APOL3	1.30313	9.21131	15.8013	6.9506e-46	3.6402e-44	93.4735
NLRP3	1.303	5.77728	17.0556	1.04244e-51	6.6671e-50	106.815
GIMAP4	1.30053	8.96405	19.7926	9.3016e-65	1.13297e-62	136.72
SLC22A3	1.29949	4.38224	8.76465	2.95952e-17	5.40079e-16	28.0669
SIGLEC9	1.29738	5.38132	18.1271	8.98257e-57	7.01187e-55	118.42
FOLR2	1.29693	6.70818	12.673	4.24969e-32	1.36535e-30	61.9222
CLEC9A	1.29583	2.16082	10.7323	2.58363e-24	6.31451e-23	44.1433
RTP4	1.29543	6.84788	10.4741	2.45893e-23	5.78256e-22	41.9114
C3AR1	1.29356	8.14385	19.3308	1.56026e-62	1.59364e-60	131.621
RNASE6	1.29336	7.74536	20.6538	6.38935e-69	9.78906e-67	146.262
LTF	1.29288	11.033	4.20105	3.14852e-05	0.000163271	1.03063
PLD4	1.29261	6.04824	9.26123	6.02713e-19	1.18978e-17	31.9123
IL16	1.29256	8.51646	16.927	4.17895e-51	2.63981e-49	105.433
GP1BA	1.29224	3.52286	10.4342	3.47061e-23	8.09678e-22	41.5701
APOC2	1.29195	6.28542	10.6308	6.28857e-24	1.50999e-22	43.2621
TRAF1	1.28884	7.73809	16.7091	4.35865e-50	2.63928e-48	103.1
TYROBP	1.28834	9.35747	21.3365	3.12955e-72	5.78826e-70	153.849
CCL7	1.28832	1.94183	7.58914	1.59656e-13	2.35469e-12	19.6016
WIPF1	1.28793	10.052	20.3338	2.26166e-67	3.15863e-65	142.712
CD300C	1.2866	4.79916	17.3371	4.95036e-53	3.33216e-51	109.847
GMFG	1.28576	7.66541	21.1874	1.65515e-71	2.92933e-69	152.191
PSAT1	1.28489	6.42936	5.88475	7.32648e-09	7.1796e-08	9.09559
PTGFR	1.28448	4.5465	8.33048	7.85903e-16	1.33454e-14	24.8327
CD33	1.28421	5.71566	19.0271	4.4885e-61	4.30603e-59	128.277
DPT	1.28348	8.54618	9.41278	1.7835e-19	3.63247e-18	33.1157
MMP3	1.28303	7.05393	6.93412	1.27333e-11	1.63385e-10	15.3033
FMO1	1.28194	6.4994	9.46982	1.12387e-19	2.31425e-18	33.5722
IL18	1.28179	7.13942	14.2039	1.09312e-38	4.43511e-37	76.9965
BEND4	1.27977	1.38121	11.7216	3.41654e-28	9.5301e-27	52.9977
ABCA9	1.27779	5.30296	8.51287	2.01104e-16	3.53481e-15	26.1765
TAP1	1.27688	11.2701	13.7678	8.91965e-37	3.35386e-35	72.6219
SLC1A3	1.2761	7.99585	15.5385	1.10865e-44	5.56492e-43	90.7189
SLC19A3	1.27391	4.71119	6.10255	2.09968e-09	2.19595e-08	10.3127
MMP1	1.27215	7.17069	5.33106	1.483e-07	1.21012e-06	6.17654
DOCK11	1.27121	8.10934	14.5397	3.54845e-40	1.51455e-38	80.4038
PRAM1	1.27108	4.61443	16.4587	6.39233e-49	3.6454e-47	100.428
XCR1	1.27059	1.54845	13.4207	2.83717e-35	1.02009e-33	69.1844
UBASH3B	1.27008	6.7565	12.2926	1.61811e-30	4.86379e-29	58.3091
CFP	1.27004	4.04691	11.7952	1.72817e-28	4.89369e-27	53.6738
IFI30	1.26986	11.5276	19.3396	1.41447e-62	1.45195e-60	131.719
LYN	1.26927	9.02497	17.0593	1.00134e-51	6.4242e-50	106.855
TRPV2	1.26864	7.59938	21.0155	1.12893e-70	1.83944e-68	150.28
DPP4	1.26799	7.01673	10.2179	2.22365e-22	5.01115e-21	39.731
SLC15A3	1.26509	9.06636	19.6812	3.20635e-64	3.8495e-62	135.488
SIRPB1	1.26369	5.97221	14.3705	2.00355e-39	8.37736e-38	78.683
CCDC69	1.26164	8.25334	13.751	1.0553e-36	3.95353e-35	72.4548
MIAT	1.2612	6.92229	11.5283	2.02698e-27	5.48997e-26	51.2316
BCL11A	1.26095	5.38973	5.59838	3.57923e-08	3.19208e-07	7.55415
APOBEC3C	1.26004	7.24914	15.9613	1.27861e-46	6.83588e-45	95.1575
CMKLR1	1.25807	8.07069	16.3725	1.60693e-48	9.03843e-47	99.5113
PIGR	1.25786	6.7639	4.47532	9.46385e-06	5.50093e-05	2.17672
GBP6	1.25687	3.17533	8.48688	2.44547e-16	4.26192e-15	25.9836
CTSC	1.25665	10.5748	15.168	5.35264e-43	2.49183e-41	86.8633
SLCO2B1	1.25569	9.39531	16.6276	1.04583e-49	6.22345e-48	102.229
IL7	1.25499	3.97681	12.2616	2.17158e-30	6.49892e-29	58.017
CCL4L2	1.25352	5.76126	11.303	1.58094e-26	4.16112e-25	49.1947
HLA.B	1.25334	14.442	15.2507	2.26025e-43	1.07414e-41	87.7206
DOCK8	1.25235	9.29511	15.2964	1.4022e-43	6.72597e-42	88.1953
HAMP	1.25233	3.70301	11.0091	2.22433e-25	5.6377e-24	46.5735
PTPRO	1.25218	6.05484	15.5228	1.30781e-44	6.54862e-43	90.5546
BHLHE22	1.25108	4.55183	12.4065	5.47493e-31	1.67762e-29	59.3847
VSIG4	1.25005	7.71199	13.4885	1.44712e-35	5.27696e-34	69.8532
SLC34A2	1.24902	6.77477	4.13349	4.19196e-05	0.000209853	0.758675
TMEM71	1.2484	4.68095	9.25867	6.15205e-19	1.21327e-17	31.892
TNFAIP3	1.24835	9.22744	16.96	2.92473e-51	1.85323e-49	105.788
AGAP2	1.24783	6.35384	14.6605	1.02597e-40	4.48152e-39	81.6374
LRRC25	1.24751	6.67907	21.7415	3.38641e-74	8.17916e-72	158.355
SLC9A9	1.24738	6.50764	17.5629	4.25458e-54	2.97097e-52	112.289
JSRP1	1.2461	2.45174	7.83898	2.77567e-14	4.33672e-13	21.3223
FCGR1B	1.24577	6.57046	17.5791	3.56772e-54	2.5084e-52	112.464
TMIGD2	1.2453	1.68762	12.7905	1.36542e-32	4.47795e-31	63.0496
IFI16	1.24513	10.6196	16.8805	6.89487e-51	4.30248e-49	104.935
G0S2	1.24489	6.54885	8.36215	6.21222e-16	1.06458e-14	25.0644
PADI2	1.24339	9.64849	7.22247	1.92369e-12	2.62066e-11	17.1569
LSP1	1.24333	9.89063	18.4281	3.30298e-58	2.79054e-56	121.707
GNGT2	1.24291	4.16754	21.3611	2.37826e-72	4.5209e-70	154.122
IDO2	1.24198	1.14508	14.4361	1.02558e-39	4.32345e-38	79.3487
CARD9	1.24182	5.42225	11.548	1.69296e-27	4.59136e-26	51.4102
CLEC4D	1.24114	1.19874	11.2295	3.07387e-26	7.94792e-25	48.5354
C17orf60	1.241	4.14754	17.0869	7.42961e-52	4.79654e-50	107.152
LPXN	1.24084	8.34733	20.2579	5.26363e-67	7.20415e-65	141.871
TACR1	1.24001	4.65838	7.33938	8.78896e-13	1.22765e-11	17.9258
ABCA6	1.2398	5.88656	9.11369	1.94677e-18	3.76694e-17	30.7539
CD300LB	1.23912	3.74682	13.017	1.5075e-33	5.13249e-32	65.238
CD68	1.2386	11.0339	20.1674	1.44126e-66	1.89674e-64	140.868
ICAM1	1.23808	10.0644	14.0176	7.21749e-38	2.85501e-36	75.1206
HCP5	1.23525	9.24458	12.2843	1.75069e-30	5.24697e-29	58.2309
C2	1.23437	9.36049	13.7241	1.38148e-36	5.16607e-35	72.1872
LGALS9	1.23153	9.98278	16.3136	3.01362e-48	1.67668e-46	98.8857
IL18BP	1.23103	7.91563	19.0418	3.81728e-61	3.67928e-59	128.438
APOBEC3D	1.23033	5.97312	12.9645	2.51628e-33	8.48265e-32	64.7292
CLEC6A	1.22931	0.96983	12.509	2.05477e-31	6.44036e-30	60.3576
LIMD2	1.22813	8.10014	14.1073	2.91378e-38	1.17524e-36	76.0221
ITGAM	1.22742	8.30204	13.4959	1.34513e-35	4.91378e-34	69.9258
FCGR1C	1.22674	4.99119	16.4703	5.64885e-49	3.23038e-47	100.551
GPR141	1.22647	3.26116	12.3392	1.03879e-30	3.15946e-29	58.749
LEP	1.22638	3.74665	4.91687	1.19596e-06	8.30901e-06	4.16146
IL9R	1.22516	2.62494	13.1644	3.5583e-34	1.23398e-32	66.672
OLR1	1.22351	8.15549	12.0871	1.1282e-29	3.28539e-28	56.3817
LAIR2	1.22248	1.26219	12.8857	5.41907e-33	1.80606e-31	63.9673
PILRA	1.22082	6.84554	19.5366	1.59459e-63	1.76956e-61	133.891
TOX2	1.22079	5.15159	11.732	3.10539e-28	8.69764e-27	53.0924
NR4A3	1.21812	5.9551	9.99847	1.4251e-21	3.11579e-20	37.8923
CD40	1.21785	7.70991	16.6848	5.66142e-50	3.39851e-48	102.84
TSPAN32	1.21773	2.81467	13.4309	2.56532e-35	9.23965e-34	69.2844
ALOX5AP	1.2176	8.15801	15.619	4.75389e-45	2.43994e-43	91.5611
P2RY12	1.21736	3.62275	9.44066	1.42345e-19	2.91942e-18	33.3386
HERC5	1.215	7.71005	10.3047	1.05795e-22	2.41191e-21	40.4664
STAC	1.21445	4.33262	7.42275	4.99809e-13	7.1208e-12	18.4802
DAPP1	1.21419	7.66596	10.8566	8.62953e-25	2.13451e-23	45.2299
GIMAP1	1.21312	6.17317	15.5737	7.65478e-45	3.88992e-43	91.0873
HERC6	1.21244	8.64027	9.12165	1.82809e-18	3.54063e-17	30.816
MX2	1.21103	8.78563	13.1389	4.57087e-34	1.57714e-32	66.4233
EMR2	1.21035	6.77513	15.6442	3.64762e-45	1.88629e-43	91.8245
KIF21B	1.2098	6.9484	12.6563	4.99329e-32	1.59925e-30	61.7621
CIDEC	1.20962	4.51145	4.67888	3.72165e-06	2.33442e-05	3.07049
SERPINB9	1.2082	7.94043	16.6194	1.14208e-49	6.77654e-48	102.142
APOE	1.20747	11.6393	14.5115	4.73881e-40	2.01424e-38	80.1162
ALDH1A1	1.20725	8.2433	10.9259	4.6692e-25	1.17044e-23	45.8386
RBP4	1.20691	5.24784	5.61848	3.20886e-08	2.88559e-07	7.66016
HPSE	1.20566	5.34693	11.7084	3.86175e-28	1.07428e-26	52.8762
CEACAM21	1.20341	3.75165	12.2921	1.62634e-30	4.88139e-29	58.304
GPR132	1.20294	6.31861	14.527	4.0421e-40	1.72166e-38	80.2743
GABRP	1.2027	7.8739	3.60693	0.000341085	0.00137196	-1.21879
ICAM4	1.20258	2.29683	14.091	3.43536e-38	1.38019e-36	75.8584
LCP1	1.20102	11.4223	14.0555	4.92088e-38	1.95786e-36	75.5012
APOL6	1.19944	10.7464	15.1621	5.69368e-43	2.63863e-41	86.8018
TSHR	1.1991	2.36519	10.9619	3.3884e-25	8.53545e-24	46.1563
LAT2	1.19899	7.52959	19.6157	6.6307e-64	7.47957e-62	134.765
CMPK2	1.19831	7.94222	10.9	5.87351e-25	1.46339e-23	45.6112
TLR1	1.19777	7.37397	15.216	3.24628e-43	1.5321e-41	87.3605
KCNAB2	1.19538	7.66086	17.6492	1.66331e-54	1.19397e-52	113.223
SLCO5A1	1.19485	2.86727	8.40871	4.3916e-16	7.58919e-15	25.4063
C10orf54	1.19173	8.7558	18.0923	1.31496e-56	1.01489e-54	118.04
LILRA3	1.18955	1.74491	10.8021	1.39704e-24	3.439e-23	44.7525
RSPO3	1.18921	5.45257	10.6037	7.96553e-24	1.9082e-22	43.0279
TM7SF4	1.18847	3.33659	10.3964	4.81077e-23	1.11473e-21	41.2468
WNT2	1.18833	7.25103	9.80323	7.28291e-21	1.564e-19	36.2783
FMO2	1.18806	7.39515	6.96293	1.05705e-11	1.36058e-10	15.4858
CXCL1	1.18357	3.2052	6.19195	1.24378e-09	1.3341e-08	10.8232
NLRC4	1.18355	5.27726	18.9814	7.43617e-61	7.00296e-59	127.775
CH25H	1.18256	4.96795	10.7202	2.87427e-24	7.01651e-23	44.0377
GABRE	1.1812	5.04068	6.47051	2.33899e-10	2.70684e-09	12.4547
COL29A1	1.17907	1.27174	10.2705	1.41842e-22	3.21769e-21	40.1761
CSTA	1.1772	6.47496	7.89315	1.88888e-14	2.98527e-13	21.7011
SH2D1B	1.17495	2.41364	12.381	6.97927e-31	2.13221e-29	59.1437
MFNG	1.17478	7.16927	17.6154	2.40374e-54	1.70168e-52	112.857
TLR4	1.17426	8.36699	16.8915	6.12648e-51	3.83465e-49	105.052
HP	1.17365	3.58376	5.43818	8.44826e-08	7.16114e-07	6.72139
CD1D	1.17274	4.82409	15.0468	1.89083e-42	8.60727e-41	85.6083
IRF1	1.17114	10.0911	17.2974	7.61344e-53	5.07481e-51	109.418
ITM2A	1.17019	7.93692	10.4716	2.51181e-23	5.89343e-22	41.8903
CAMK4	1.16873	3.77245	11.2569	2.40038e-26	6.23795e-25	48.7806
HCG26	1.16719	5.22052	11.8338	1.20686e-28	3.43169e-27	54.0301
CCDC88B	1.16617	7.0916	15.7425	1.29324e-45	6.73863e-44	92.8559
MARCH1	1.1658	6.20335	16.6639	7.09015e-50	4.23142e-48	102.616
KBTBD8	1.16425	5.09125	14.2044	1.08796e-38	4.42294e-37	77.0012
GGTA1	1.1642	6.80256	12.4519	3.54784e-31	1.09038e-29	59.8154
LY96	1.16278	6.48874	18.8883	2.078e-60	1.93037e-58	126.752
CD300LG	1.16073	3.65849	5.4945	6.26117e-08	5.38508e-07	7.01174
FCGR2C	1.1604	5.93766	12.7999	1.24616e-32	4.09995e-31	63.1404
ABP1	1.15977	3.67449	6.61475	9.62086e-11	1.15372e-09	13.3233
GLT1D1	1.15911	2.14274	11.7857	1.88711e-28	5.32907e-27	53.5866
IGF1	1.15871	7.84676	7.6114	1.36847e-13	2.0285e-12	19.7532
FLJ40330	1.15776	4.2926	7.25366	1.56237e-12	2.14984e-11	17.361
KMO	1.15656	6.92782	7.1075	4.11661e-12	5.4768e-11	16.4104
C13orf18	1.15559	6.28923	11.8553	9.88201e-29	2.82166e-27	54.2284
PLA1A	1.15478	5.35589	9.36935	2.53181e-19	5.11093e-18	32.7694
CLEC4C	1.15475	0.874858	11.9844	2.95871e-29	8.55526e-28	55.425
IFIT2	1.15453	9.14901	10.7545	2.12576e-24	5.20785e-23	44.3366
ALOX5	1.15433	8.29888	13.6757	2.24244e-36	8.35524e-35	71.7058
B2M	1.1521	15.1771	18.2632	2.0212e-57	1.62091e-55	119.904
FXYD2	1.15169	1.44481	13.6047	4.5562e-36	1.67632e-34	71.0014
FAM107A	1.15029	6.10252	7.28011	1.30899e-12	1.81334e-11	17.5347
ASGR2	1.15024	2.3857	15.055	1.73517e-42	7.93387e-41	85.6937
CLIC2	1.15013	7.65826	16.585	1.65204e-49	9.74608e-48	101.774
HLA.H	1.14422	10.4696	13.7839	7.59017e-37	2.86445e-35	72.7823
UNC13D	1.14389	8.12178	10.0228	1.16126e-21	2.55252e-20	38.0949
CD97	1.1434	9.10431	14.8724	1.15208e-41	5.15299e-40	83.8114
FAM49A	1.14188	5.95431	12.3078	1.4004e-30	4.22176e-29	58.4525
RAB33A	1.14186	3.84994	14.8381	1.64281e-41	7.28444e-40	83.4586
AMPD1	1.13876	1.87869	8.64619	7.32675e-17	1.31484e-15	27.1724
LY75	1.13779	8.53554	9.30497	4.2469e-19	8.45672e-18	32.2582
FAM159A	1.13755	2.93456	12.5054	2.1279e-31	6.64929e-30	60.3229
SAMHD1	1.13744	9.76728	15.9736	1.12205e-46	6.01453e-45	95.2874
FAM179A	1.13743	1.97546	10.1188	5.16168e-22	1.15184e-20	38.8974
TLR6	1.13671	5.25167	11.7718	2.1471e-28	6.05495e-27	53.4585
GAPT	1.13665	5.87536	10.9719	3.10103e-25	7.82114e-24	46.2442
ITPRIPL1	1.13619	4.00227	10.6961	3.54939e-24	8.61335e-23	43.8287
STAT1	1.13613	12.6411	13.9524	1.39378e-37	5.49218e-36	74.4665
LIPG	1.13379	5.19613	7.56459	1.89159e-13	2.77586e-12	19.4349
HLA.A	1.13376	13.824	13.7691	8.80039e-37	3.31508e-35	72.6353
P2RX7	1.13338	5.91986	11.6405	7.22819e-28	1.99724e-26	52.2544
ZFP57	1.13296	2.64978	5.14465	3.86119e-07	2.9392e-06	5.25152
GSDMC	1.13258	4.03952	5.92034	5.98832e-09	5.95064e-08	9.29186
LRRC2	1.13249	3.01267	10.6989	3.46497e-24	8.41844e-23	43.8525
C1R	1.13243	11.808	14.2886	4.62023e-39	1.91623e-37	77.8525
RASGRF1	1.13219	4.74868	6.90323	1.55346e-11	1.9809e-10	15.1085
GBP2	1.13214	10.7917	13.3952	3.65212e-35	1.30852e-33	68.9335
SLC38A5	1.13199	6.74665	8.80881	2.10616e-17	3.86412e-16	28.4026
GPR133	1.13138	4.75878	8.33732	7.47026e-16	1.27273e-14	24.8827
TTC24	1.13063	1.00954	13.0459	1.13599e-33	3.88697e-32	65.5191
DOK3	1.1304	7.13874	19.6702	3.62009e-64	4.29598e-62	135.367
MOXD1	1.13005	7.30902	9.58379	4.44171e-20	9.27652e-19	34.49
SERPING1	1.12906	12.1582	15.4229	3.72925e-44	1.83162e-42	89.5125
RASSF5	1.12851	8.75498	13.4178	2.91905e-35	1.0477e-33	69.1561
CPNE5	1.1282	5.96287	10.7634	1.96516e-24	4.82592e-23	44.4144
COL4A3	1.12731	2.54821	7.84243	2.70856e-14	4.23832e-13	21.3464
LY86	1.12731	6.89692	17.6769	1.23021e-54	8.89305e-53	113.524
CHST11	1.12693	7.23431	15.549	9.93252e-45	4.99791e-43	90.8282
EN1	1.12473	5.55195	5.40238	1.02064e-07	8.5351e-07	6.53826
CILP	1.12342	10.5674	6.438	2.8514e-10	3.26306e-09	12.2612
PPP2R2B	1.12328	3.32852	10.1342	4.53051e-22	1.0132e-20	39.0265
IL34	1.12216	6.19295	7.95509	1.21332e-14	1.94301e-13	22.1367
FCHO1	1.11957	5.9006	8.09937	4.28488e-15	7.06009e-14	23.1616
LRRK2	1.11918	7.27579	9.10357	2.1088e-18	4.06896e-17	30.6749
ITGA4	1.11881	8.27611	12.7646	1.75453e-32	5.72663e-31	62.8007
DERL3	1.11831	7.72186	10.2744	1.37132e-22	3.1143e-21	40.2096
BTN3A3	1.11792	8.84005	15.2057	3.61314e-43	1.69743e-41	87.2541
OSCAR	1.11785	6.32117	15.5514	9.68527e-45	4.8975e-43	90.8533
CASP10	1.11607	7.33896	14.4781	6.67239e-40	2.83025e-38	79.776
GLIPR2	1.11595	8.98706	12.3619	8.37597e-31	2.55511e-29	58.9627
SPNS3	1.11547	2.63167	10.9252	4.69646e-25	1.17583e-23	45.8328
PRG4	1.11426	5.41966	5.35635	1.29961e-07	1.06938e-06	6.3043
GPR110	1.11253	2.99669	5.20701	2.81238e-07	2.19871e-06	5.55768
GPA33	1.11149	2.27027	13.9052	2.24313e-37	8.77172e-36	73.9936
C1orf106	1.11081	7.26464	5.1306	4.14521e-07	3.12987e-06	5.18299
ISG15	1.11033	10.0022	7.49028	3.15254e-13	4.56429e-12	18.933
GPSM3	1.10884	8.50052	16.3273	2.60344e-48	1.45637e-46	99.0312
CCL20	1.10729	3.00055	6.64929	7.75901e-11	9.38118e-10	13.5337
NLRC3	1.10724	6.69166	15.4346	3.30064e-44	1.6289e-42	89.6339
CR1L	1.10682	1.06847	11.7132	3.69266e-28	1.02863e-26	52.9206
CCL23	1.10605	1.40145	12.7616	1.80501e-32	5.88203e-31	62.7725
PLA2G4A	1.10484	5.81787	8.49636	2.27722e-16	3.98222e-15	26.0539
MMP9	1.10458	9.99418	7.25463	1.55232e-12	2.13886e-11	17.3674
TAP2	1.10324	10.2121	13.2193	2.07335e-34	7.23911e-33	67.2085
LGI2	1.1031	6.28897	12.1879	4.36069e-30	1.28443e-28	57.3251
CD300A	1.1031	7.26514	18.2468	2.41795e-57	1.93153e-55	119.726
PPP1R14C	1.1017	4.95447	4.5808	5.86051e-06	3.54392e-05	2.63527
HLA.E	1.10062	12.513	18.7906	6.11157e-60	5.50309e-58	125.678
NLRP1	1.10027	7.44574	13.4612	1.89824e-35	6.87318e-34	69.5836
PLCL2	1.10026	7.10316	12.7295	2.4622e-32	7.9856e-31	62.4642
BACH2	1.09907	6.28095	10.4514	2.99118e-23	7.00216e-22	41.7174
ENPP2	1.09894	8.56134	9.37636	2.39279e-19	4.83981e-18	32.8252
GPR97	1.09884	2.59226	9.19173	1.04881e-18	2.05262e-17	31.3649
COTL1	1.09835	10.9616	14.2841	4.8364e-39	2.00184e-37	77.8071
GIMAP2	1.09795	7.38233	13.0122	1.579e-33	5.36703e-32	65.192
SIGLEC8	1.09736	5.52964	9.31695	3.85791e-19	7.69707e-18	32.3531
IFI6	1.09546	11.5749	7.25558	1.54244e-12	2.12669e-11	17.3736
ABCB1	1.09418	5.71653	8.39086	5.01687e-16	8.63338e-15	25.2751
ABCA8	1.09339	5.33984	5.14668	3.82183e-07	2.91248e-06	5.26142
CD14	1.09312	9.82524	14.8631	1.26924e-41	5.6524e-40	83.7151
IFIT1	1.09296	9.90648	7.38962	6.25847e-13	8.84284e-12	18.2593
BATF3	1.09271	4.2549	14.5496	3.2064e-40	1.3714e-38	80.5045
EPHB6	1.09257	5.95393	7.43345	4.64709e-13	6.64841e-12	18.5517
RELN	1.09254	3.75921	5.87361	7.8021e-09	7.62023e-08	9.03439
AKNA	1.09153	9.13232	17.8703	1.49103e-55	1.11312e-53	115.624
FAS	1.09044	7.80672	13.6081	4.40448e-36	1.62341e-34	71.0351
SIGLEC12	1.09	2.04031	7.4088	5.49478e-13	7.79598e-12	18.3871
ECEL1	1.08936	3.22117	6.01966	3.39321e-09	3.45549e-08	9.84495
TMEM176B	1.08867	9.99498	10.6756	4.24973e-24	1.02764e-22	43.6503
PTCRA	1.08627	1.52137	13.4647	1.83347e-35	6.65038e-34	69.6181
GPR82	1.08619	2.88618	11.8113	1.48795e-28	4.21928e-27	53.8223
LCN2	1.08609	5.99247	4.12009	4.43478e-05	0.000220611	0.705222
PVRIG	1.08541	5.4311	12.208	3.60745e-30	1.06409e-28	57.5133
ST8SIA1	1.08497	6.08491	7.6629	9.56742e-14	1.43686e-12	20.1051
NPL	1.08493	7.61937	15.991	9.32744e-47	5.02605e-45	95.4712
GIMAP6	1.08437	8.42921	14.5851	2.22779e-40	9.66947e-39	80.8665
MSR1	1.08211	9.52155	13.104	6.43255e-34	2.21578e-32	66.0839
ACE2	1.08019	2.48454	5.54296	4.82869e-08	4.21136e-07	7.26365
B3GNT3	1.07975	5.30599	5.09114	5.0553e-07	3.76716e-06	4.99142
KLRG1	1.07757	4.41707	11.5709	1.37088e-27	3.7376e-26	51.6195
TLR2	1.07699	8.17795	13.8967	2.44224e-37	9.53218e-36	73.9091
APOL4	1.07602	7.64225	9.94573	2.21885e-21	4.84091e-20	37.4542
C6orf105	1.07594	4.24587	6.99602	8.53007e-12	1.10697e-10	15.696
LIME1	1.0715	5.52294	9.0496	3.22651e-18	6.15044e-17	30.2549
ABI3	1.07107	7.33174	20.1189	2.47367e-66	3.23468e-64	140.33
PLEKHG7	1.0706	1.68624	7.485	3.26866e-13	4.72908e-12	18.8974
FABP7	1.07011	3.43825	3.57307	0.000387121	0.0015328	-1.33725
LILRA1	1.06994	2.50137	11.3601	9.41413e-27	2.49383e-25	49.7087
ARNTL2	1.0684	5.76302	7.90716	1.70928e-14	2.70977e-13	21.7994
PLCG2	1.06772	8.32613	11.7049	3.98842e-28	1.10652e-26	52.8442
REC8	1.06746	5.24974	7.75498	5.02231e-14	7.66602e-13	20.7389
MYO7A	1.06642	6.39947	8.92898	8.29487e-18	1.54391e-16	29.3225
MCTP2	1.06442	5.82145	7.64298	1.09904e-13	1.63978e-12	19.9687
DOCK10	1.06179	8.73423	12.5016	2.20604e-31	6.88299e-30	60.2871
UTS2	1.06133	1.17415	8.90881	9.70529e-18	1.80316e-16	29.1675
RAB39	1.06112	2.89513	9.69661	1.75923e-20	3.72341e-19	35.4059
FCGR2A	1.05993	9.51732	16.3298	2.53537e-48	1.42216e-46	99.0576
PRDM8	1.05982	4.172	12.8003	1.24156e-32	4.09137e-31	63.1441
MCART6	1.0594	3.56721	10.6471	5.45466e-24	1.31283e-22	43.403
P2RY14	1.05822	4.88763	13.1597	3.72663e-34	1.29018e-32	66.6261
RASAL1	1.05724	4.62074	4.76901	2.43474e-06	1.58834e-05	3.47782
RGS13	1.05697	2.39261	8.66446	6.37478e-17	1.14903e-15	27.3098
CHRNA6	1.05554	3.0208	8.36827	5.93584e-16	1.01892e-14	25.1093
C5AR1	1.05525	7.55569	14.7719	3.25723e-41	1.43193e-39	82.7781
CLEC2B	1.05524	7.46051	15.634	4.06192e-45	2.09e-43	91.7175
CLIC5	1.05478	6.43313	10.8599	8.38016e-25	2.07533e-23	45.259
MLKL	1.05339	7.36034	15.6016	5.71204e-45	2.91712e-43	91.3785
KLRC4	1.05293	1.20356	9.85224	4.84521e-21	1.04707e-19	36.6814
FLI1	1.05275	8.25811	16.834	1.13729e-50	7.07534e-49	104.437
PIK3R6	1.05123	4.90024	15.0924	1.17581e-42	5.4124e-41	86.0807
C19orf38	1.05117	4.28541	12.7336	2.36688e-32	7.68861e-31	62.5034
ZBTB32	1.04857	2.71055	11.5216	2.15563e-27	5.81784e-26	51.1706
CXCL5	1.04826	2.25959	5.74768	1.5782e-08	1.4883e-07	8.34938
DAPK1	1.04812	8.66468	11.1902	4.384e-26	1.12786e-24	48.1834
SFRP1	1.04803	9.39866	4.06422	5.59898e-05	0.000271486	0.484121
HLA.G	1.04741	5.735	8.22014	1.77386e-15	2.96318e-14	24.0304
HAAO	1.04679	5.66184	11.7295	3.17636e-28	8.88428e-27	53.07
ADAM8	1.04346	8.23472	10.7093	3.16339e-24	7.70576e-23	43.9428
PLXNC1	1.04334	8.15217	8.65292	6.96068e-17	1.25134e-15	27.223
DPYD	1.04334	8.45399	12.9308	3.49311e-33	1.17179e-31	64.4034
CD83	1.04283	8.38951	14.5602	2.87505e-40	1.23483e-38	80.613
HVCN1	1.04279	6.60315	16.6741	6.35082e-50	3.80124e-48	102.726
CASP5	1.04229	1.12295	12.1231	8.04259e-30	2.34871e-28	56.7176
GPNMB	1.04137	12.0065	12.308	1.39829e-30	4.22161e-29	58.454
TGM2	1.04132	10.4562	11.265	2.23e-26	5.80988e-25	48.8536
SLC26A9	1.04078	1.93247	5.60049	3.5384e-08	3.1584e-07	7.56529
CXCL2	1.04074	3.74694	6.44625	2.71174e-10	3.10844e-09	12.3102
TLR9	1.04049	4.36955	10.5468	1.30794e-23	3.11147e-22	42.5367
KLRF1	1.04019	2.13938	9.38281	2.2715e-19	4.60354e-18	32.8766
SNAI3	1.03927	3.94797	14.319	3.3898e-39	1.40876e-37	78.1603
MUC15	1.03907	4.76072	3.82232	0.000148942	0.000654208	-0.440556
SLFN11	1.03904	8.9755	13.8673	3.28447e-37	1.27227e-35	73.6147
S100A4	1.03734	10.0843	13.0485	1.10799e-33	3.79749e-32	65.5438
SEMA3A	1.03725	4.91377	9.89507	3.38975e-21	7.35641e-20	37.0349
EDN1	1.03697	7.05846	7.9527	1.23432e-14	1.97511e-13	22.1198
KCNN3	1.03693	4.57394	10.5519	1.25141e-23	2.98044e-22	42.5804
CLCN4	1.03582	6.09744	7.64207	1.10601e-13	1.64897e-12	19.9625
GALNT12	1.03538	5.40591	8.54498	1.5786e-16	2.78425e-15	26.4153
RASSF2	1.03351	9.00182	13.9127	2.07943e-37	8.14707e-36	74.0689
PRDM1	1.03291	8.41778	15.3018	1.32486e-43	6.38485e-42	88.2518
MFAP4	1.0328	8.92792	6.89529	1.63475e-11	2.07939e-10	15.0585
CCDC141	1.0321	2.48865	10.4317	3.54895e-23	8.27015e-22	41.548
OBFC2A	1.03207	7.46446	13.1459	4.266e-34	1.47443e-32	66.4918
PLIN1	1.03163	6.81487	4.28162	2.22651e-05	0.000119321	1.36036
MGC12916	1.02999	2.76246	10.303	1.07359e-22	2.44355e-21	40.4519
MYBPC2	1.02983	1.32319	8.08079	4.90299e-15	8.05912e-14	23.0289
ZNF804A	1.02913	3.01229	11.2806	1.93745e-26	5.067e-25	48.993
CYP1B1	1.02878	10.1928	8.22235	1.74533e-15	2.91788e-14	24.0464
ANKRD44	1.02864	5.87533	10.056	8.77961e-22	1.93604e-20	38.3717
CCRL2	1.02733	5.82765	15.2113	3.40801e-43	1.60473e-41	87.3122
NEURL3	1.02713	3.94978	7.87834	2.09883e-14	3.30944e-13	21.5973
PLB1	1.027	4.90439	11.0785	1.196e-25	3.05016e-24	47.1885
ERAP2	1.02676	8.88289	5.8461	9.10987e-09	8.81365e-08	8.88364
GIMAP8	1.02605	7.7309	14.0842	3.68119e-38	1.47319e-36	75.7897
NCCRP1	1.02577	5.45237	4.20819	3.05392e-05	0.000158928	1.05963
GLYATL2	1.02462	6.02779	3.86838	0.000124107	0.000555948	-0.268593
C12orf59	1.02459	4.28797	12.3307	1.12653e-30	3.42126e-29	58.6685
CCR6	1.02431	5.73023	8.72085	4.14219e-17	7.50567e-16	27.7351
LONRF3	1.02383	3.73855	8.61131	9.55262e-17	1.70091e-15	26.9107
INSL3	1.0232	1.47924	11.9782	3.13583e-29	9.02926e-28	55.3673
CD36	1.02173	9.26617	5.38514	1.11754e-07	9.29626e-07	6.45043
GRAMD2	1.01855	6.43889	5.58166	3.91859e-08	3.4766e-07	7.46625
TNFRSF4	1.01798	5.38323	11.4693	3.48004e-27	9.32704e-26	50.6956
CHST2	1.01778	6.85141	10.8773	7.18658e-25	1.78404e-23	45.4112
KCNJ5	1.01482	5.33621	10.4155	4.08011e-23	9.48637e-22	41.4099
KCNJ15	1.01422	4.72043	9.09593	2.23995e-18	4.31389e-17	30.6154
ALDH1A2	1.01368	4.48165	6.91816	1.41126e-11	1.80631e-10	15.2026
L1CAM	1.01333	5.18573	4.78218	2.28698e-06	1.50053e-05	3.53797
PTX3	1.01142	4.314	5.25349	2.21596e-07	1.76264e-06	5.78806
RASGEF1B	1.01074	7.39978	11.5947	1.10237e-27	3.01352e-26	51.8357
CFH	1.01017	9.82835	12.2402	2.65971e-30	7.89073e-29	57.8158
ARRDC5	1.00946	1.54743	12.7807	1.50161e-32	4.90892e-31	62.9552
SLC8A1	1.00915	7.44102	13.8056	6.10033e-37	2.31497e-35	72.9994
TMEM176A	1.00886	8.86377	8.95144	6.96193e-18	1.3029e-16	29.4955
MCTP1	1.00639	6.4655	9.77453	9.24005e-21	1.97602e-19	36.0428
POU3F1	1.00516	2.88818	8.49323	2.33132e-16	4.0699e-15	26.0307
GPD1	1.00381	6.2012	4.15482	3.83134e-05	0.000194264	0.844097
VSTM2L	1.00358	4.93299	4.78089	2.30104e-06	1.50831e-05	3.53208
LPAR5	1.00354	6.60471	14.243	7.34284e-39	3.01497e-37	77.392
TNFRSF13C	1.00144	2.06844	8.46565	2.86785e-16	4.98534e-15	25.8265
ACHE	1.0008	3.93418	7.82088	3.15539e-14	4.90017e-13	21.1961
TMEM119	1.00031	9.18959	10.0463	9.53e-22	2.09701e-20	38.2905
down-regulated IRGs
	logFC	AveExpr	t	P.Value	adj.P.Val	B
CPB1	-2.35875	6.72055	-5.23432	2.44545e-07	1.92874e-06	5.69279
KCNJ3	-1.94167	4.72022	-5.34982	1.3447e-07	1.10515e-06	6.27129
EEF1A2	-1.81745	8.91829	-6.44318	2.76283e-10	3.16346e-09	12.292
COL2A1	-1.51182	5.03886	-4.62788	4.71759e-06	2.9076e-05	2.84312
CST9	-1.43916	3.41471	-4.59501	5.49002e-06	3.34451e-05	2.69782
ASCL1	-1.39983	2.56246	-4.97456	9.01821e-07	6.44876e-06	4.43333
NKAIN1	-1.37622	8.14625	-5.60094	3.52979e-08	3.15346e-07	7.56765
SYT13	-1.36872	7.48059	-4.32101	1.87584e-05	0.000102399	1.52364
CYP2A6	-1.36179	3.24815	-4.25687	2.47799e-05	0.000131319	1.25846
ABCC8	-1.35959	5.42673	-5.07721	5.42031e-07	4.01584e-06	4.92415
AKR7A3	-1.35954	7.80546	-5.79019	1.24591e-08	1.18694e-07	8.57918
TMPRSS6	-1.35624	5.07739	-5.58427	3.86367e-08	3.43233e-07	7.47995
TMEM145	-1.29319	4.08409	-6.85262	2.14868e-11	2.71127e-10	14.7907
TRH	-1.29089	3.29181	-4.61591	4.98598e-06	3.06015e-05	2.79009
DNAJC12	-1.28575	8.457	-6.24099	9.30788e-10	1.01267e-08	11.106
RIMS4	-1.28	7.36524	-4.80447	2.05652e-06	1.36668e-05	3.64004
MYT1	-1.27876	3.66693	-5.74494	1.60237e-08	1.50871e-07	8.33461
NBPF4	-1.25777	4.56171	-4.73891	2.80752e-06	1.80345e-05	3.341
KCNC2	-1.25711	2.54623	-4.2765	2.2765e-05	0.00012171	1.33921
ERBB4	-1.24761	8.49471	-4.96782	9.32195e-07	6.64974e-06	4.40141
LPPR3	-1.23215	5.37108	-4.94014	1.06762e-06	7.50627e-06	4.27076
MS4A8B	-1.22744	2.56994	-5.48107	6.72632e-08	5.75381e-07	6.94227
SYTL5	-1.21812	6.29864	-4.83385	1.78661e-06	1.19866e-05	3.77529
NPY1R	-1.21654	8.76262	-4.03547	6.30614e-05	0.000302347	0.371417
CACNA2D2	-1.21474	7.53781	-6.9188	1.4054e-11	1.79993e-10	15.2066
ESR1	-1.20343	11.738	-4.21212	3.00302e-05	0.000156756	1.07562
AGR3	-1.19954	8.85437	-3.35281	0.000860835	0.00309563	-2.0818
DHRS2	-1.18436	7.26776	-3.42827	0.000657776	0.00244286	-1.8318
TNNT1	-1.1836	7.09646	-4.28161	2.22659e-05	0.000119321	1.36032
CLSTN2	-1.18304	9.10586	-5.33639	1.44237e-07	1.17882e-06	6.20343
TFF3	-1.1819	9.72573	-3.65251	0.000287193	0.00117898	-1.05767
CASKIN1	-1.18136	4.71778	-8.80304	2.202e-17	4.03274e-16	28.3587
SERPINA5	-1.1732	8.50981	-4.53337	7.27816e-06	4.32602e-05	2.42788
FLJ45983	-1.17149	6.58879	-4.93183	1.11184e-06	7.77189e-06	4.23168
AFF3	-1.17148	9.95189	-5.06327	5.81143e-07	4.29168e-06	4.85694
FAM196A	-1.17131	5.05322	-4.90935	1.24055e-06	8.58103e-06	4.12622
C20orf114	-1.16891	6.25616	-3.83847	0.000139741	0.000618914	-0.38047
SERPINA11	-1.16771	5.88278	-3.92304	9.97128e-05	0.000456433	-0.0620094
SYNPO2L	-1.1635	3.10836	-5.03536	6.67776e-07	4.87187e-06	4.72293
DOK7	-1.16243	5.74576	-5.39415	1.06587e-07	8.88444e-07	6.49626
IGDCC3	-1.16181	3.51225	-4.87299	1.47966e-06	1.00787e-05	3.95661
C1orf64	-1.15318	6.61567	-3.56988	0.000391741	0.00154931	-1.34834
CGA	-1.14734	2.35762	-4.14575	3.98091e-05	0.00020056	0.807726
C10orf82	-1.1469	4.09963	-4.08278	5.18321e-05	0.000253481	0.557275
LONRF2	-1.11991	8.48684	-5.90096	6.68432e-09	6.59439e-08	9.18485
GFRA1	-1.0981	10.9637	-3.59275	0.000359705	0.00143533	-1.26854
DACH1	-1.09571	7.96185	-4.98268	8.66498e-07	6.21131e-06	4.47183
NEURL	-1.09361	6.24968	-4.94104	1.06293e-06	7.48098e-06	4.275
WNK4	-1.08468	7.44162	-4.08025	5.23812e-05	0.000255983	0.547283
STC2	-1.08344	11.8051	-5.20155	2.89185e-07	2.25569e-06	5.53075
ELOVL2	-1.07978	7.6759	-4.20347	3.11613e-05	0.000161755	1.04046
NBPF6	-1.07536	3.13988	-4.22593	2.8307e-05	0.00014882	1.13183
CEACAM5	-1.06813	6.81496	-3.26315	0.00117747	0.00406686	-2.37194
PVALB	-1.06706	3.59141	-3.62465	0.000319095	0.00129467	-1.15638
GRIA2	-1.06481	3.63766	-3.41772	0.000683208	0.00252316	-1.86709
BMPR1B	-1.05573	8.75355	-3.30724	0.00101027	0.00355761	-2.2302
MAPT	-1.05219	10.0269	-4.80988	2.00404e-06	1.33494e-05	3.66489
IGFALS	-1.02974	4.62889	-4.98507	8.56376e-07	6.1409e-06	4.48315
SLC39A6	-1.02938	13.6919	-6.72591	4.79985e-11	5.88304e-10	14.0037
HEPACAM2	-1.0275	3.74652	-4.31227	1.94873e-05	0.000105945	1.48731
TPSG1	-1.02134	3.13726	-4.42883	1.16548e-05	6.64832e-05	1.97774
FOXA1	-1.01619	11.7374	-4.41844	1.22072e-05	6.93068e-05	1.93352
FSIP1	-1.01299	6.80888	-4.05782	5.74946e-05	0.000277916	0.458983
KCNJ11	-1.00376	7.89339	-6.8806	1.79643e-11	2.27799e-10	14.9661
